# Supplementary material for: Primary and secondary sources ofambientformaldehydein the Yangtze River Delta based on OMPS observation
Source: Copernicus journal article supplement (doi:10.5194/acp-2018-1192), 2019-01-02
Supplement: Supplementary file 1 [file acp-2018-1192-supplement.pdf]

# Primary and secondary sources of ambient formaldehyde in the Yangtze River Delta based on OMPS observation

Wenjing Su<sup>1</sup>, Cheng Liu<sup>1, 2, 3, 4</sup>, Qihou Hu<sup>2</sup>, Shaohua Zhao<sup>5</sup>, Youwen Sun<sup>2</sup>, Wei Wang<sup>2</sup>, Yizhi Zhu<sup>2</sup>, Jianguo Liu<sup>2, 3</sup>, Jhoon Kim<sup>6</sup>

<sup>1</sup>School of Earth and Space Sciences, University of Science and Technology of China, Hefei, 230026, China

<sup>2</sup>Key Lab of Environmental Optics & Technology, Anhui Institute of Optics and Fine Mechanics, Chinese Academy of Sciences, Hefei, 230031, China

<sup>3</sup>Center for Excellence in Regional Atmospheric Environment, Institute of Urban Environment, Chinese Academy of Sciences, Xiamen, 361021, China

<sup>4</sup>Anhui Province Key Laboratory of Polar Environment and Global Change, USTC, Hefei, 230026, China

<sup>5</sup>Satellite Environment Center, State Environmental Protection Key Laboratory of Satellite Remote Sensing, Ministry of Ecology and Environment, Beijing, 100094, China

<sup>6</sup>Department of Atmospheric Sciences, Yonsei University, Seoul, 03722, Korea

Correspondence to: Cheng Liu (chliu81@ustc.edu.cn), Qihou Hu (qhhu@aiofm.ac.cn)

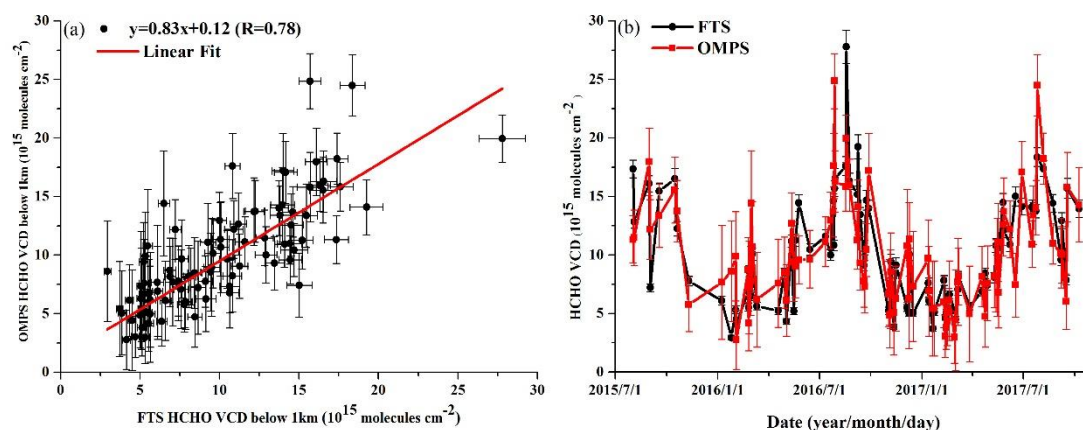

Figure S1. (a) Correlation analysis and (b) time series of tropospheric HCHO VCDs measured by OMPS and HCHO Column below 1km measured by FTS from Jul.1<sup>st</sup>, 2015 to Nov.20<sup>th</sup>, 2017.

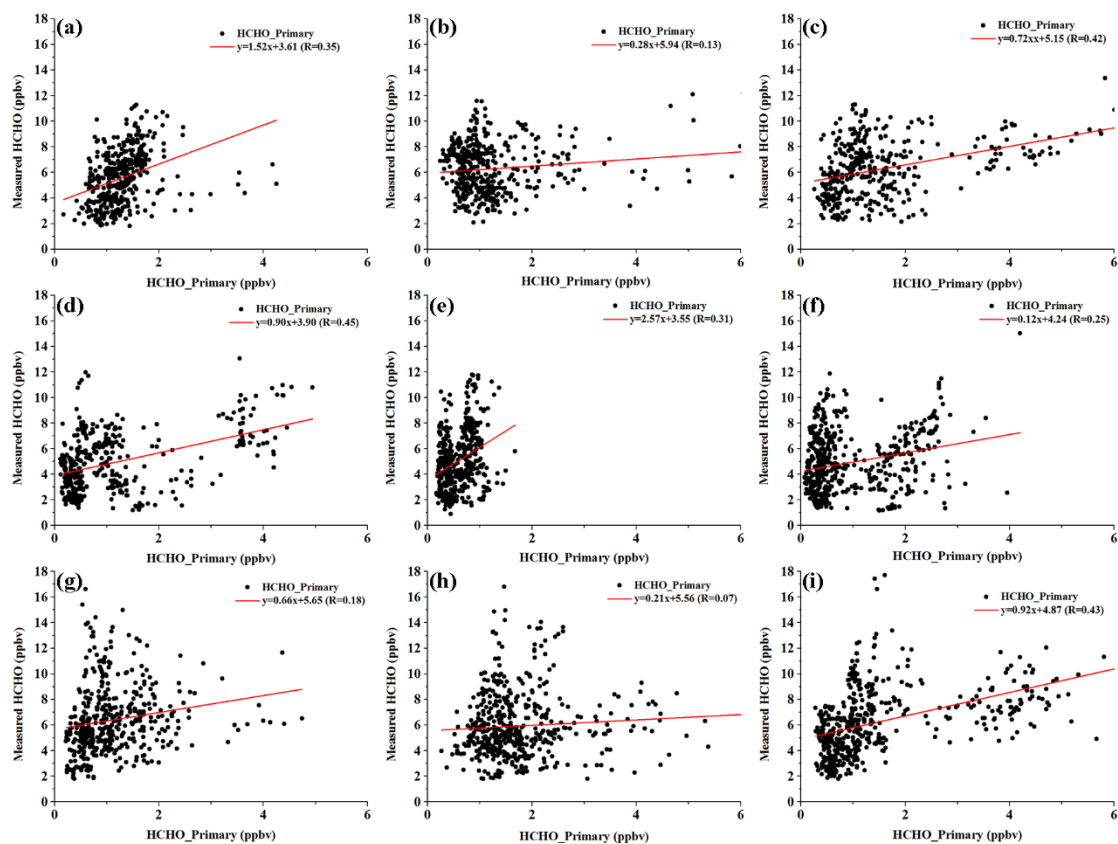

**Figure S2.** Correlation analysis of total HCHO and primary HCHO from 2015 to 2017 at RJR site (a), MGQ site (b), and XLUT site (c) in Nanjing, at XS site (d), CXT site (e), and FDCH site (f) in Hangzhou, and at HK site (g), PDNA site (h), and DSL site (i) in Shanghai.
